# Supplementary material
Source: publisher site journal article supplement (https://www.dovepress.com/get_supplementary_file.php?f=217570.xlsx)
Supplement: Supplementary file 1 [file get_supplementary_file.php]

## Sheet: Supplemental table_Diet
Supplementary Table 1: characteristics of diet
	Baseline	P-value
Energy intake (Kcal)
NW	1950.8 ± 317.1	0.954
W	1958.3 ± 351.6
Alcohol (g)
NW	7.7 ± 9.0	0.977
W	7.8 ± 11.6
Protein (g)
NW	71.2 ± 11.7	0.552
W	74.1 ± 14.0
Lipids (g)
NW	81.9 ± 14.7	0.495
W	78.4 ± 11.3
Carbohydrates (g)
NW	240.4 ± 53.5	0.644
W	240.4 ± 57.8
Protein (%)
NW	15.1 ± 1.2	0.418
W	15.6 ± 1.4
Lipids (%)
NW	39.3 ± 5.7	0.413
W	37.6 ± 4.4
Carbohydrates (%)
NW	45.8 ± 5.6	0.628
W	46.8 ± 5.0
